# Ultrasound Images of the Epidural Space through the Acoustic Window of the Infant

Tricia M. Vecchione, M.D., M.P.H., Karen R. Boretsky, M.D.

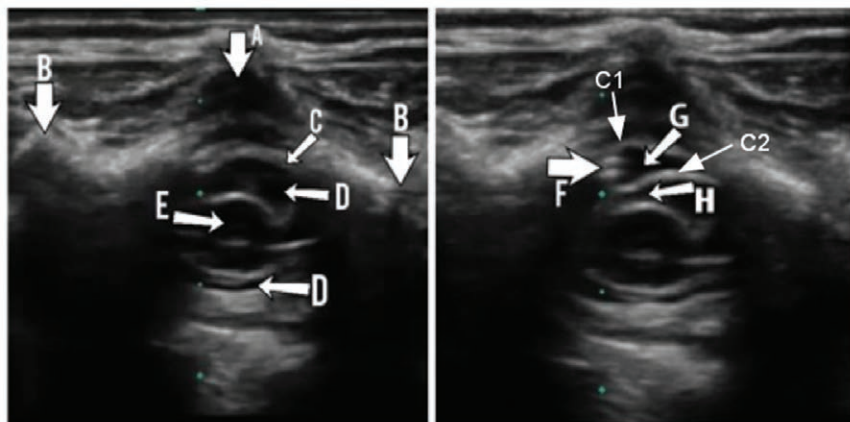

**E**PIDURAL analgesia, a core competency of anesthesiology, is traditionally accomplished using surface landmarks and blind needle insertion into a potential space between the ligamentum flavum and dura. While vertebral ossification prevents detailed ultrasound images of the epidural space in adults, the absence of ossification of the infant spine provides excellent acoustic windows and an opportunity for visualization.<sup>1</sup>

We present images of a 5-day-old, 3.2-kg infant having a tracheo-

esophageal fistula repair *via* thoracotomy. The epidural catheter was placed into the caudal canal using ultrasound imaging and advanced to T5. The spine was imaged transversely with a high-frequency linear transducer before and after injection of local anesthetic. The figure shows the spinous (A) and transverse (B) processes, the cerebrospinal fluid (D), the spinal cord (E), and the creation of the epidural space (G) between the ligamentum flavum (C1) and dura (C2) deforming the subarachnoid space with displacement of cerebrospinal fluid (H). This can be seen in the Supplemental Digital Content 1, video 1, <http://links.lww.com/ALN/B339>. The catheter tip (F) is visible.

Epidural catheter placement is common for major thoracoabdominal surgeries, but detailed ultrasound images are unique to younger infants.<sup>2</sup> At the age of 9 months, vertebral ossification becomes more robust, impedes transmission of ultrasound waves, and causes shadowing of underlying structures resulting in increasingly narrow acoustic windows. Imaging is further challenged in larger patients since sound-wave degradation is directly proportional to the amount of tissue penetrated. Real-time ultrasound images may improve the efficacy and safety of blind epidural catheter insertion, but crisp imaging is limited to young infants. These unique views may assist with overall understanding of neuraxial dynamics.

## Competing Interests

The authors declare no competing interests.

## Correspondence

Address correspondence to Dr. Vecchione: [tvecchi2@jhmi.edu](mailto:tvecchi2@jhmi.edu)

## References

1. Rapp HJ, Folger A, Grau T: Ultrasound-guided epidural catheter insertion in children. *Anesth Analg* 2005; 101:333–9, table of contents
2. Coley BD, Murakami JW, Koch BL, Shiels WE 2nd, Bates G, Hogan M: Diagnostic and interventional ultrasound of the pediatric spine. *Pediatr Radiol* 2001; 31:775–85

Supplemental Digital Content is available for this article. Direct URL citations appear in the printed text and are available in both the HTML and PDF versions of this article. Links to the digital files are provided in the HTML text of this article on the Journal's Web site ([www.anesthesiology.org](http://www.anesthesiology.org)).

From the Division of Pediatric Anesthesiology and Critical Care Medicine, Department of Anesthesiology and Critical Care Medicine, Johns Hopkins University School of Medicine, Baltimore, Maryland (T.M.V.); and Department of Anesthesiology, Perioperative, and Pain Medicine, Boston Children's Hospital, Boston, Massachusetts (K.R.B.).

Copyright © 2017, the American Society of Anesthesiologists, Inc. Wolters Kluwer Health, Inc. All Rights Reserved. *Anesthesiology* 2017; 126:562
